# Supplementary material
Source: PubMed Central journal article supplement (PMC4455767)
Supplement: NIHMS693528-supplement-supplement_1.pdf [file NIHMS693528-supplement-supplement_1.pdf]

## Supplementary Information

# Fn14 receptor promotes invasive potential and metastatic capacity of non-small lung adenocarcinoma cells through the up-regulation of integrin $\alpha 6$

J. JANDOVA<sup>1,2\*</sup>, C. J. MASON<sup>1</sup>, S. C. PAWAR<sup>1,3</sup>, G. S. WATTS<sup>1,3</sup>

<sup>1</sup>University of Arizona Cancer Center and Departments of <sup>2</sup>Medicine – Dermatology Section and <sup>3</sup>Pharmacology, University of Arizona, Tucson, AZ 85724, USA

\*Correspondence: [jjandova@email.arizona.edu](mailto:jjandova@email.arizona.edu)

### Supplementary Figure

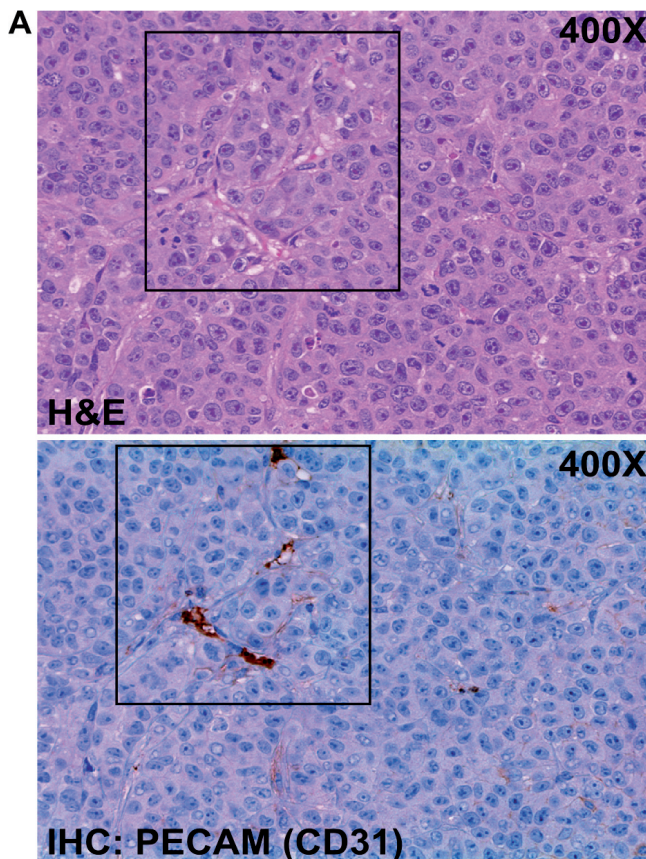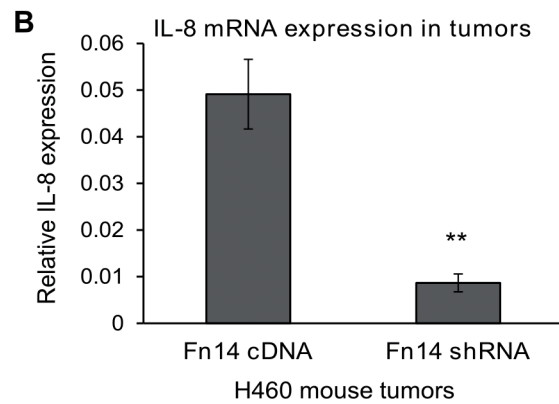

Supplemental Figure 1. Increased levels of vascularization visible in Fn14 cDNA tumors relative to Fn14 shRNA tumors. A) H&E and immunohistochemistry for PECAM, an endothelial (vascular) cell marker, from serial sections of Fn14 over-expressing tumors are shown relative to almost no vascularization present in tumors formed from H460 cells expressing negligible levels of Fn14 which were significantly necrotic. B) Quantitative RTPCR histogram showing the mRNA expression levels of angiogenic factor IL-8 in tumors produced by mice injected with altered levels of Fn14. The data are presented as a mean  $\pm$  SEM with  $p < .05$ .
